# Supplementary material
Source: MDPI journal article supplement (https://www.mdpi.com/2077-1312/11/10/1944)
Supplement: s1 [file s1]

# BioMd

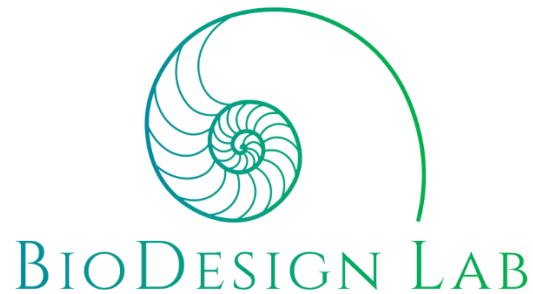

<https://biomd.org/>

<https://biodesignlab.co.nz/>

## **Supplementary Figures for:**

New insights into sea turtle propulsion methods and cost of transport point to the effectiveness of the animal's swimming technique.

### **Authors:**

Nick van der Geest,<sup>1</sup> Lorenzo Garcia<sup>1\*</sup>, Roy Nates<sup>1</sup>

\*Corresponding Author: [lorenzo.garcia@aut.ac.nz](mailto:lorenzo.garcia@aut.ac.nz)

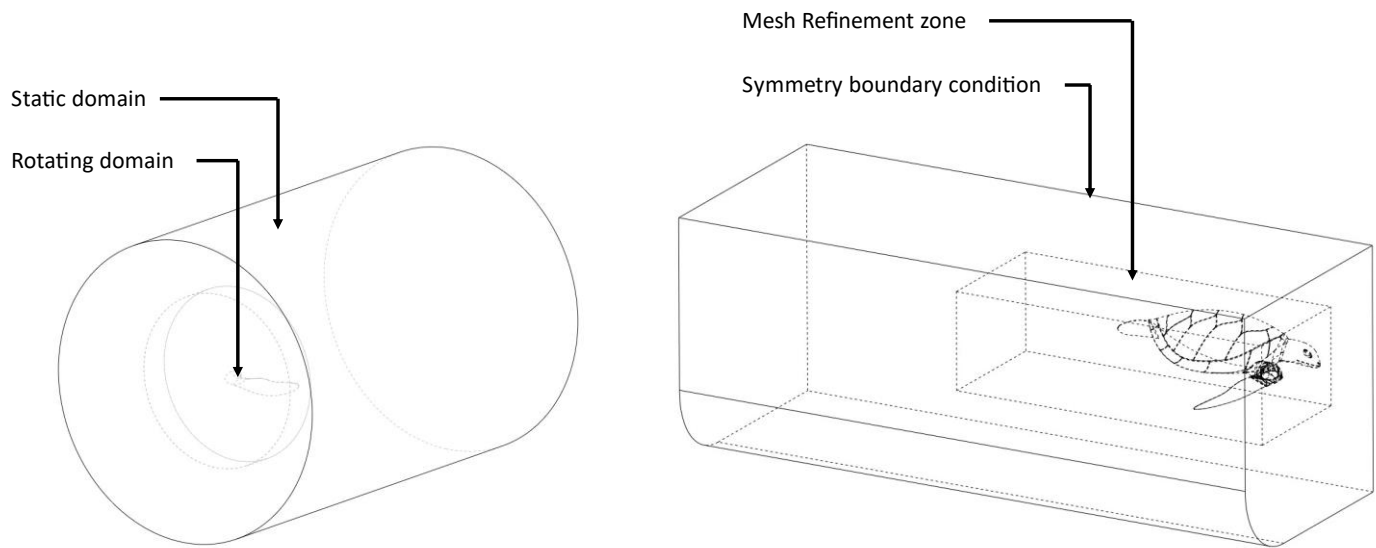

Figure S1 CFD computational domains, (a)  $k\epsilon$  rotational domain for downstroke simulations. (b)  $k\omega$  domain for simulating flow over the rear flippers

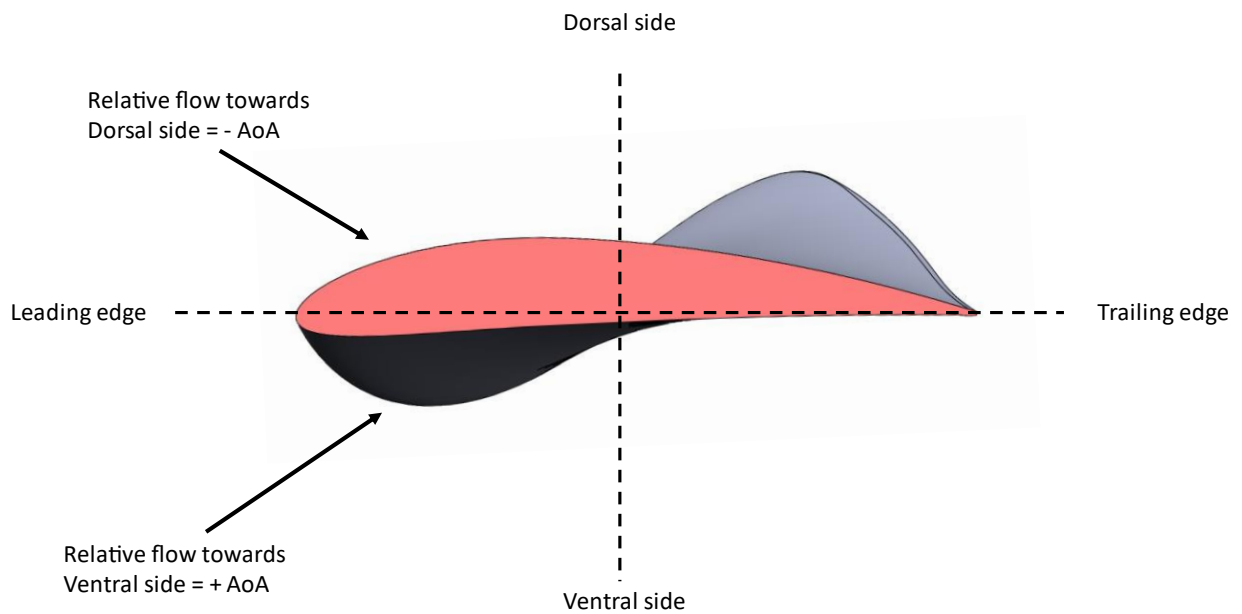

Figure S2 free body diagram of the twisted turtle flipper illustrating Dorsal and ventral sides

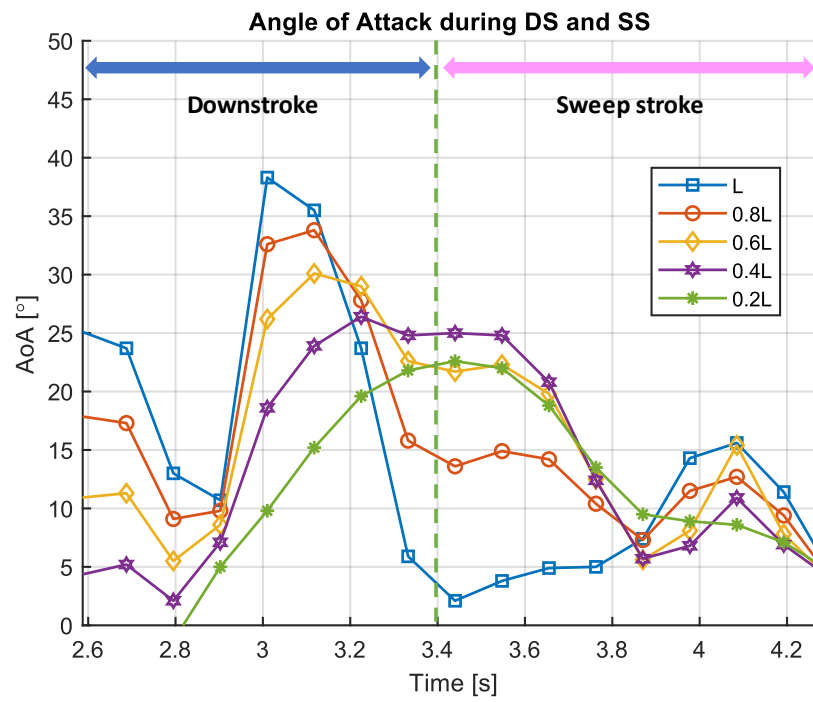

Figure S3 AOA values at various points along the turtle's flipper, L represents the complete wing span (flipper tip position)
